# Supplementary material for: Multinomial modelling of TB/HIV co-infection yields a robust predictive signature and generates hypotheses about the HIV+TB+ disease state
Source: PubMed Central journal article supplement (PMC6629068; doi:10.1371/journal.pone.0219322), 2019-07-15
Supplement: pone.0219322.s001.pdf [file pone.0219322.s001.pdf]

# six.rf.10 on validation sets: TB vs non-TB

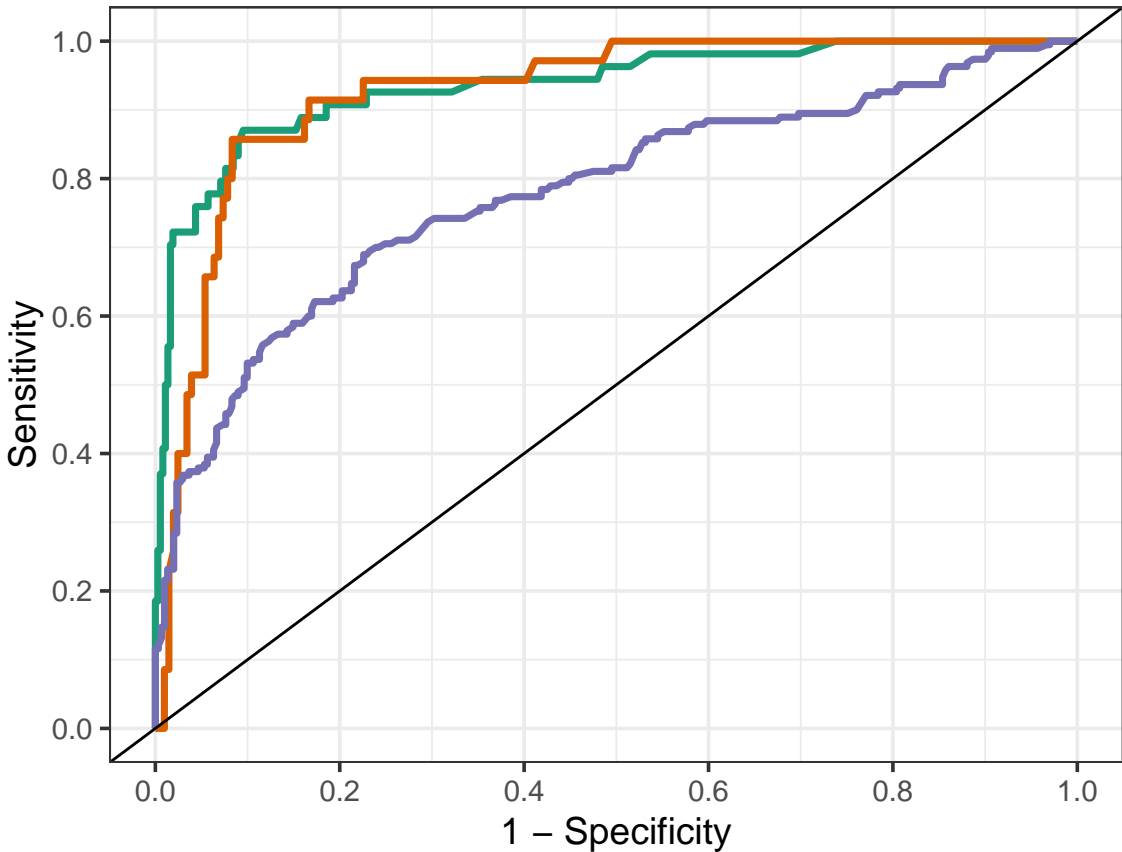

- Berry: GSE19491, AUC:0.94(0.9–0.97)
- Bloom: GSE42843, AUC:0.93(0.88–0.97)
- Anderson: GSE39941, AUC:0.78(0.73–0.82)
